# Supplementary material for: Electrospinning of mesoporous p-type In2O3/TiO2composite nanofibers for enhancing NOxgas sensing properties at room temperature
Source: Royal Society of Chemistry journal article supplement (doi:10.1039/c4ce01248h), 2014-07-31
Supplement: c4ce01248h1.pdf [file c4ce01248h1.pdf]

# Electrospinning of mesoporous p-type $\text{In}_2\text{O}_3/\text{TiO}_2$ composite nanofibers for enhancing $\text{NO}_x$ gas sensing properties at room temperature

Hongyuan Wu<sup>a</sup>, Kan Kan<sup>a,c</sup>, Linlin Wang<sup>a</sup>, Guo Zhang<sup>a</sup>, Ying Yang<sup>a,e</sup>, Hui Li<sup>a</sup>, Liqiang Jing<sup>a</sup>, Peikang Shen<sup>d</sup>, Li Li<sup>\*a,b</sup> and Keying Shi<sup>\*a</sup>

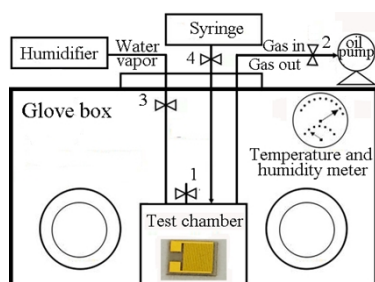

Fig. S1 The diagram of the gas delivery system for the gas sensing process.

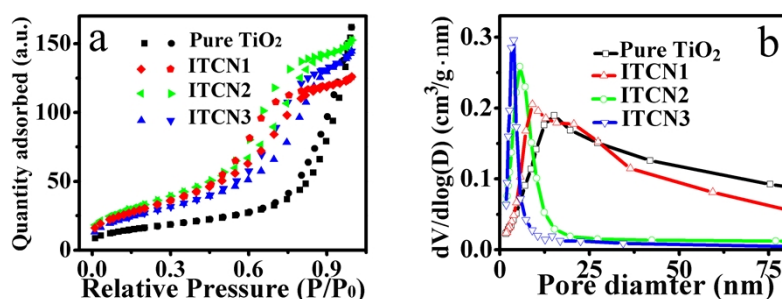

Fig. S2 (a)  $\text{N}_2$  adsorption-desorption isotherms and (b) BET pore size distribution from the adsorption branch isotherm of pure  $\text{TiO}_2$  nanofibers, ITCN1, ITCN2 and ITCN3.

Table S1 BET surface area of samples

| Samples                                    | Pure $\text{TiO}_2$ NFs | ITCN1 | ITCN2 | ITCN3 |
|--------------------------------------------|-------------------------|-------|-------|-------|
| BET surface area ( $\text{m}^2/\text{g}$ ) | 59.52                   | 99.69 | 120.8 | 111.4 |
| Dominated mesopore size (nm)               | 5.54                    | 9.05  | 15.2  | 3.84  |

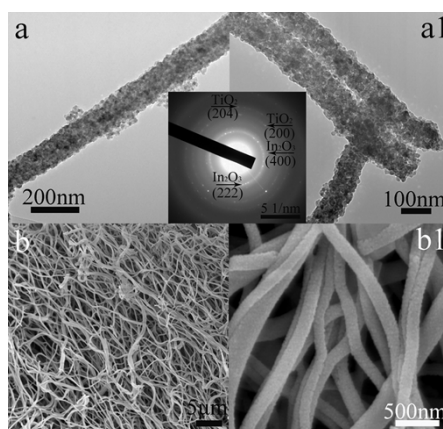

Fig. S3 (a) (a1) TEM image of ITCN3. The inset was SAED pattern of the Low magnification TEM image, (b) (b1) SEM images of ITCN3.

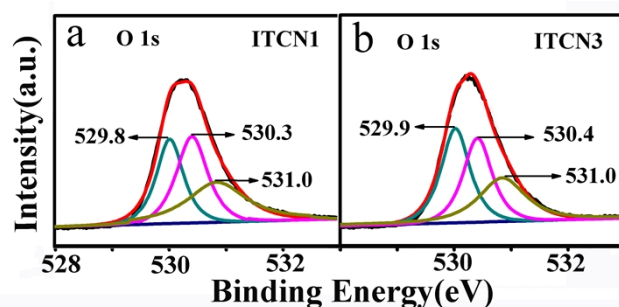

Fig. S4 XPS spectra of the O1s of (a) ITCN1; (b) ITCN3.

According to the Fig. S4 (a, b), the calculated chemisorption oxygen ( $O_b$  peak area) of ITCN1 and ITCN3 was about 32.4% and 34.1%, respectively.

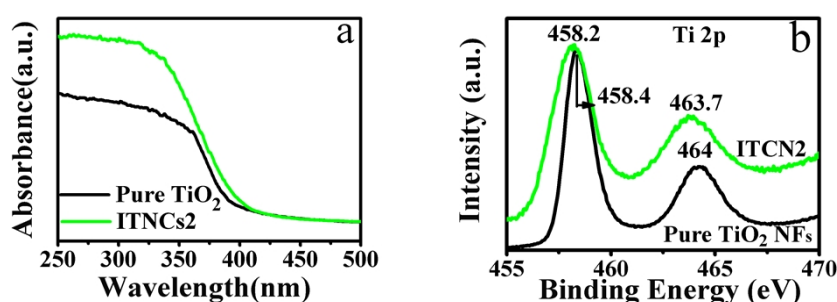

Fig. S5 (a) UV-vis absorption spectra of pure  $TiO_2$  NFs and ITCN2, (b) Raman spectra of pure  $TiO_2$  NFs and ITCN2

Fig. S5a showed the UV visible absorption spectra for the ITCN2 and the pure  $TiO_2$  NFs. As it could be seen that the pure  $TiO_2$  NFs showed a clear absorption edge at about 395 nm, this was only exhibited in the fundamental absorption in the UV region. The curves of ITCN2 exhibited a mixed absorption property of both  $TiO_2$  and  $In_2O_3$ . The ITCN2 gave an absorbance at 405 nm.

As shown in Fig. S5b, the band gap values calculated for these absorbance values were corresponding to 3.15 and 3.07 eV, which might be considered as the effects of small size and existence of  $In^{3+}$ .

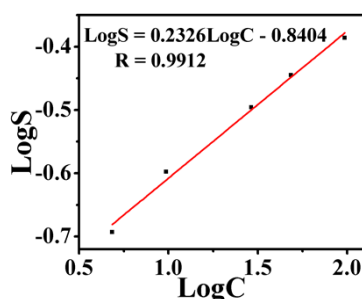

Fig. S6 The linear range of  $NO_x$  response of ITCN2.

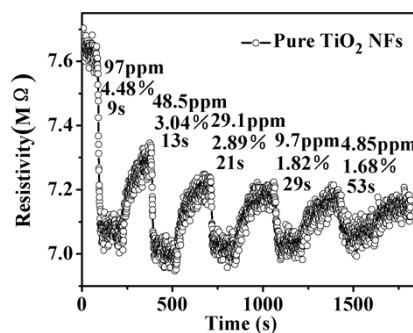

Fig. S7 Response to NO<sub>x</sub> for the sample pure TiO<sub>2</sub> NFs at room temperature. (humidity 26 %)

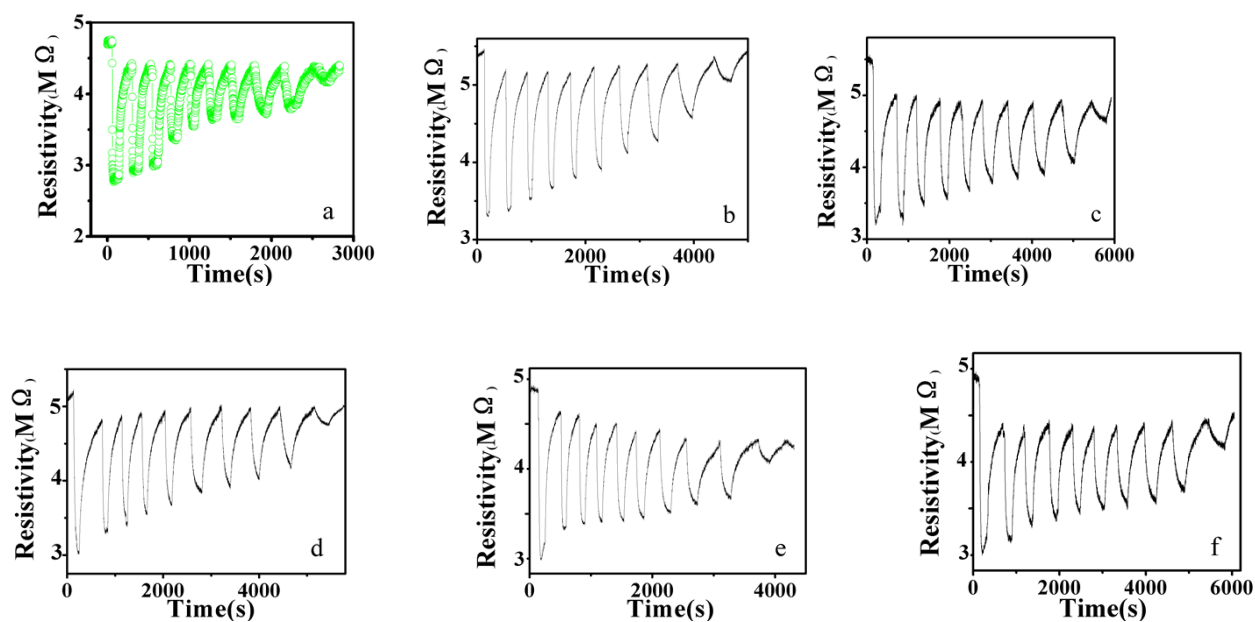

Fig. S8 Curves of the stability test of the gas response for the ITCN2 sensor to NO<sub>x</sub> at RT in air. (a) fresh; (b) after 7 days; (c) after 14 days; (d) after 21 days; (e) after 28 days; (f) after 35 days.
